# Supplementary material for: An eleven metabolic gene signature-based prognostic model for clear cell renal cell carcinoma
Source: publisher site journal article supplement (doi:10.18632/aging.104088), 2020-11-18
Supplement: Supplementary file [file aging-v12i22-104088-supplementary-material-SD1.pdf]

## SUPPLEMENTARY FIGURE

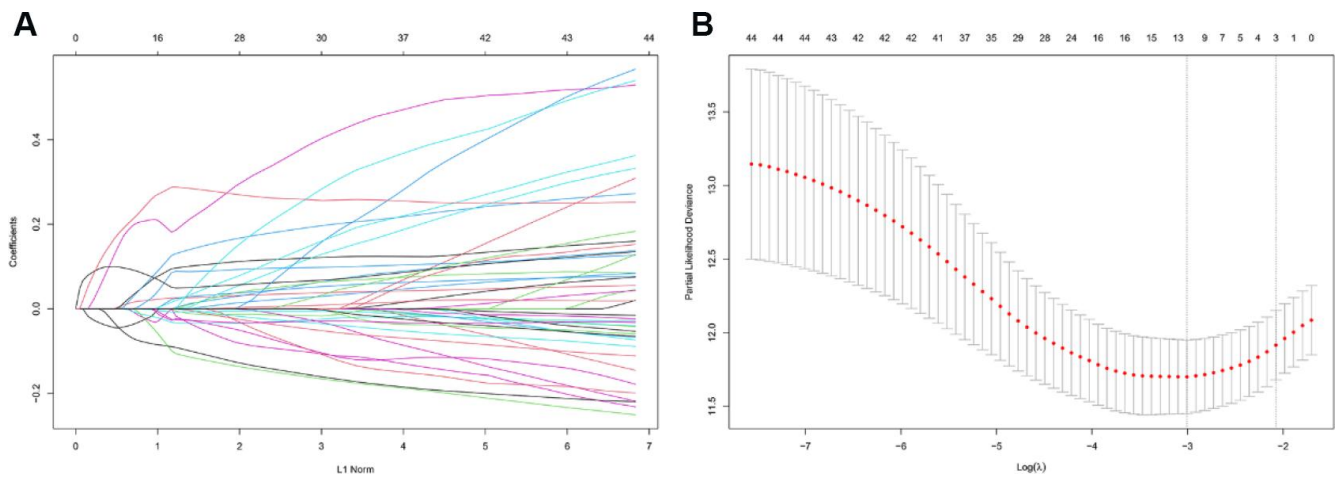

**Supplementary Figure 1. LASSO regression analysis for screening prognosis-related metabolic genes. (A)** Trajectories of model coefficients; **(B)** Cross validation fitting and performance evaluation of the model.
